# Supplementary material for: Loss of caveolin-1 alters extracellular matrix protein expression and ductal architecture in murine mammary glands
Source: PLoS One. 2017 Feb 10;12(2):e0172067. doi: 10.1371/journal.pone.0172067 (PMC5302825; doi:10.1371/journal.pone.0172067)
Supplement: S3 File — Data are provided regarding the values obtained for analyses of microvessel density in cav-1 -/- and cav-1 +/+ glands. (XLSX) [file pone.0172067.s003.xlsx]

## Sheet: Cav-
Microvessel Density	Cav-1
Vessel Density monitored in 20x images. Multiple non-overlapping images taken from each slide
Cav-1	Vessels counted manually
							Total Vessels
2016-08-09
Lt Inf Inguinal (superficial)	Number of vessels						1
Image 1	1						3
Image 2	3						2
Image 3	2						1
Image 4	1						3
							2
2016-08-04			Vessels not readily identifiable				2
Lt Inguinal (superficial)							1
							2
2016-07-27							1
Rt Sup Inguinal (superficial)	Number of vessels						1
Image 1	3						2
Image 2	2						4
Image 3	2						1
Image 4	1						1
Image 5	2						2
							3
							1
							1
							1
2016-07-18							1
Lt Sup Inguingal (deep)	Number of vessels						2
Image 1	1						2
Image 2	1						2
Image 3	2
Image 4		same image as #1					1.75	average
Image 5	4						0.84699	stdev
2016-07-12
Lt Inf Inguinal (deep)	Number of vessels
Image 1	1
Image 2	1
Image 3	2
Image 4	3
Image 5	1
Image 6	1
2016-07-06	Number of vessels
Rt Superior Inguinal (deep)
Image 1 (7)	1
Image 2 (15)	1
Image 3 (17)	2
Image 4 (18)	2
Image 6	2

## Sheet: Cav+
Microvessel Density	Cav-1
Vessel Density monitored in 20x images. Multiple non-overlapping images taken from each slide
Cav-1 +/+
2016-08-09							Total Ducts
Lt Inguinal (superficial)	Number of vessels						6
Image 1	6						1
Image 2	1						1
Image 3	1						2
							1
							2
2016-07-27							2
Lt Inf Inguinal (superficial)	Number of vessels						2
Image 1	2						2
Image 2	1						2
Image 3	2						3
Image 4	2						1
Image 5	2						3
Image 6	2						1
Right inguinal							1
Slide 1	2						1
							1
2016-07-22							3
Inguinal (deep)							1
Image 1 (5)	3						1
Image 2 (8)	1						1
							1.80952	average
							1.20909	stdev
2016-07-18
Lt Inguinal (deep)	Number of vessels
Image 1	3
Image 2	1
Image 3	1
2016-07-12
Rt Inguinal (deep)	Number of vessels
Image 1	1
Image 3	1
2016-07-07
Lt Inferior Inguinal (superficial)	Number of vessels
Image 1	3
Image 2	1
Image 3	1
Image 4	1
Image 5	same as image 3
Image 6	same as image 4
